# Supplementary material for: Apolipoprotein L-1 renal risk variants form active channels at the plasma membrane driving cytotoxicity
Source: eLife. 2020 May 19;9:e51185. doi: 10.7554/eLife.51185 (PMC7292663; doi:10.7554/eLife.51185)
Supplement: Figure 3—source data 1. [file elife-51185-fig3-data1.xlsx]

## Sheet: Data_only
Tukey's multiple comparisons test			Adjusted P Value
G0 no biotin vs. G1 no biotin			0.7086
G0 no biotin vs. G2 no biotin			0.9822
G0 no biotin vs. G0 + biotin			>0.9999
G0 no biotin vs. G1 + biotin			0.0063
G0 no biotin vs. G2 + biotin			<0.0001
G1 no biotin vs. G2 no biotin			0.9726
G1 no biotin vs. G0 + biotin			0.753
G1 no biotin vs. G1 + biotin			<0.0001
G1 no biotin vs. G2 + biotin			<0.0001
G2 no biotin vs. G0 + biotin			0.9908
G2 no biotin vs. G1 + biotin			<0.0001
G2 no biotin vs. G2 + biotin			<0.0001
G0 + biotin vs. G1 + biotin			0.0026
G0 + biotin vs. G2 + biotin			<0.0001
G1 + biotin vs. G2 + biotin			0.0448

## Sheet: Data_and_notes
	Figure 3b - FT293 cells GCaMP6f microscopy, 30 hours after induction
	Tukey's multiple comparisons test			Adjusted P Value
	G0 no biotin vs. G1 no biotin			0.7086
	G0 no biotin vs. G2 no biotin			0.9822
	G0 no biotin vs. G0 + biotin			>0.9999
	G0 no biotin vs. G1 + biotin			0.0063
	G0 no biotin vs. G2 + biotin			<0.0001
	G1 no biotin vs. G2 no biotin			0.9726
	G1 no biotin vs. G0 + biotin			0.753
	G1 no biotin vs. G1 + biotin			<0.0001
	G1 no biotin vs. G2 + biotin			<0.0001
	G2 no biotin vs. G0 + biotin			0.9908
	G2 no biotin vs. G1 + biotin			<0.0001
	G2 no biotin vs. G2 + biotin			<0.0001
	G0 + biotin vs. G1 + biotin			0.0026
	G0 + biotin vs. G2 + biotin			<0.0001
	G1 + biotin vs. G2 + biotin			0.0448
	Alternate statistical analysis of Figure 3b, directly comparing all conditions (G0/G1/G2 and +/- doxycycline) at 30 h using a one-way ANOVA with multiple comparisons.
